# Supplementary material for: Redox-active glyme–Li tetrahalogenoferrate(iii) solvate ionic liquids for semi-liquid lithium secondary batteries
Source: Royal Society of Chemistry journal article supplement (doi:10.1039/c9ra10149g), 2020-01-01
Supplement: c9ra10149g1.pdf [file c9ra10149g1.pdf]

**Supplementary information**

**Redox-Active Glyme–Li Tetrahalogenoferrate(III)  
Solvate Ionic Liquids for Semi-Liquid Lithium  
Secondary Batteries**

*Yuta Kemmizaki<sup>1</sup>, Yu Katayama<sup>1,\*</sup>, Hiromori Tsutsumi<sup>1</sup>, and Kazuhide Ueno<sup>2,\*</sup>*

<sup>1</sup> Department of Applied Chemistry, Graduate School of Sciences and Technology for Innovation,  
Yamaguchi University, Tokiwadai, Ube 755-8611, Japan

<sup>2</sup> Department of Chemistry and Biotechnology, Yokohama National University, 79-5 Tokiwadai,  
Hodogaya-ku, Yokohama 240-8501, Japan

Telephone/Fax: +81-45-339-3951. E-mail: ueno-kazuhide-rc@ynu.ac.jp

Telephone/Fax: +81- 836-85-9285. E-mail: yukty@yamaguchi-u.ac.jp

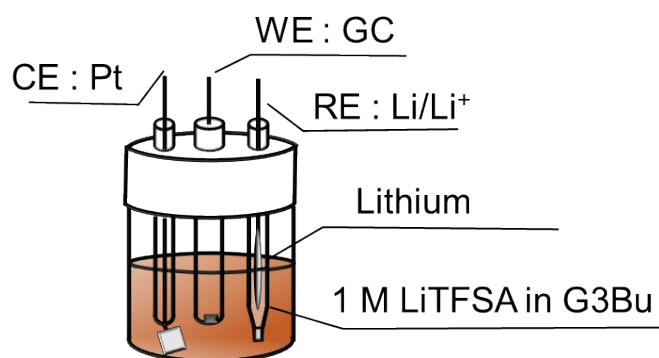

**Figure S1** Schematic of the three-electrode cell for CV.

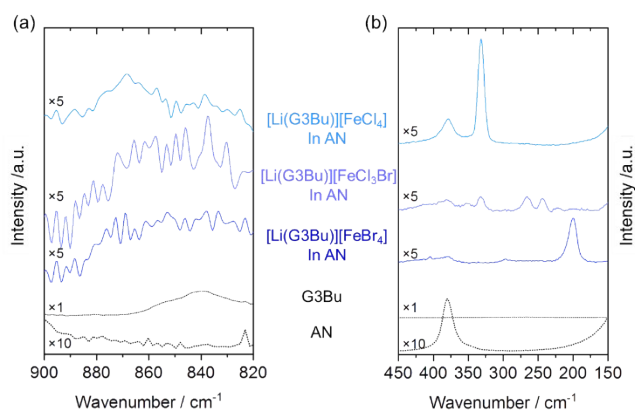

**Figure S2** Raman spectra: (a) G3Bu region and (b)  $[\text{FeX}]^-$  region, for SILs ( $[\text{Li}(\text{G3Bu})][\text{FeX}]$  ( $\text{X} = \text{Br}_4, \text{Cl}_3\text{Br}, \text{Cl}_4$ )), and solvent (acetonitrile (AN) and pure G3), at room temperature. All  $[\text{Li}(\text{G3Bu})][\text{FeX}]$  were dissolved in AN to maintain their liquid state.

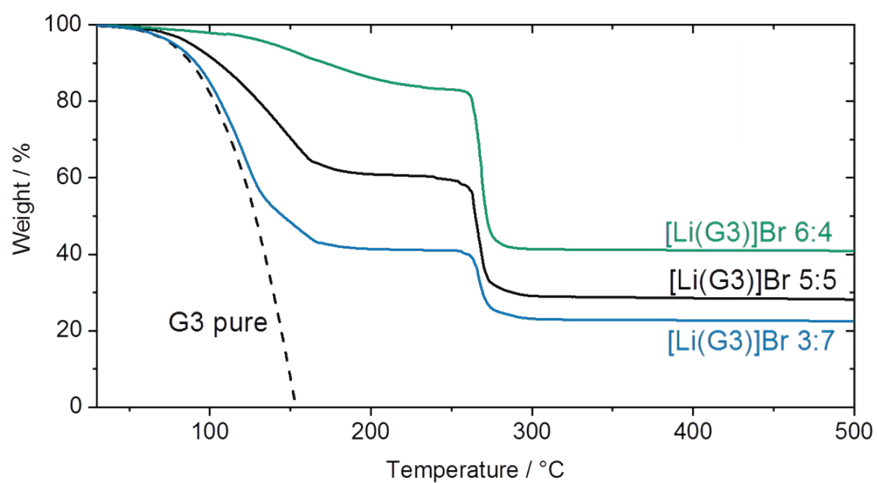

**Figure S3** Thermogravimetric curves for [Li(G3)]Br, mixed LiBr:G3 = x:y, and pure G3.

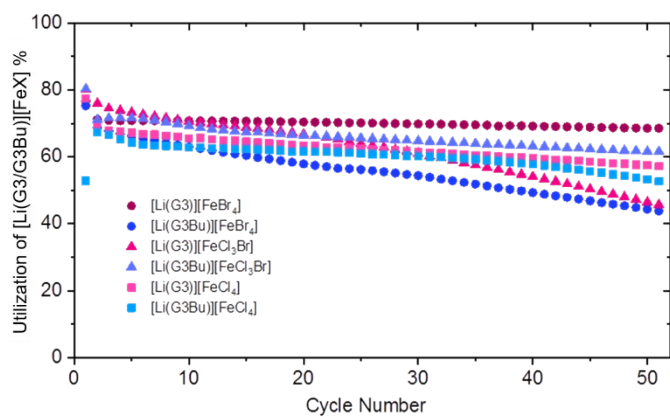

**Figure S4** Utilization ratio (experimental/theoretical discharge capacities) for each catholyte using SIL-active species at 30°C at a rate of 0.2 C.
